# Supplementary material for: Consumers discard a lot more food than widely believed: Estimates of global food waste using an energy gap approach and affluence elasticity of food waste
Source: PLoS One. 2020 Feb 12;15(2):e0228369. doi: 10.1371/journal.pone.0228369 (PMC7015318; doi:10.1371/journal.pone.0228369)
Supplement: S1 File — (XLSX) [file pone.0228369.s001.xlsx]

## Sheet: sample data and methodology
	Country	Body Weight (kg) from WHO world health survey	BMR (kcal/day)	coefficient C in equation (1)	coefficient alpha in eq (1)	PAL:f(HDI)	ER_HDI	FA (kcal/day)	FW	AIC/cap_ICP2005	WDI pop_2003			ln(AICE)	FW	residual (FW-prediction FW)							2003	AICE/cap (2005)	FA/cap IN 2003	FA/cap IN 2011			AICE/cap IN 2011	FW in 2011			WDI pop_2003	FW		FW_negative replaced with zero	FW_negative replaced with one				FW/day/cap	affluence elast	aic/CAP
1	Austria	72.1	1545.83	747.385	11.0742	1.4	2164.17	3741.8	1577.63	23444	8121423			10.0624	1577.63	275.063							world	6095	2739	2869			8647	727.409			8121423	1577.63		1577.63	1577.63
2	Bangladesh	55.9	1417.25	727.211	12.3441	1.69	2395.15	2349.6	-45.5468	1011	138600174			6.9187	-45.5468	464.71							US	31995	3780	3662			37390	1571.75			138600174	-45.5468		0	1			Zambia	-1110.63	-0.519219	897
3	Belgium	71.2	1535.34	744.432	11.1082	1.4	2149.47	3757.2	1607.73	21656	10376133			9.98304	1607.73	350.908							IND						3023	121.363			10376133	1607.73		1607.73	1607.73			Chad	-1078.06	-0.534902	931
4	bosnia&herzegovina	74.3	1592.27	747.415	11.3709	1.69	2690.94	2955.2	264.262	6437	3817313			8.76982	264.262	-292.946							CHN						4331	328.7			3817313	264.262		264.262	264.262			Zimbabwe	-1030.81	-0.559423	434
5	Brazil	66.4	1530.55	738.385	11.9303	1.69	2586.64	3009.2	422.563	5720	183627339			8.65172	422.563	-66.5457																	183627339	422.563		422.563	422.563			Ethiopia	-989.21	-0.582949	477
6	Burkina Faso	64	1523.27	718.6	12.573	2	3046.54	2440.6	-605.943	847	12651596			6.7417	-605.943	6.37904																	12651596	-605.943		0	1			Kenya	-908.183	-0.634958	1207
7	Chad	65.7	1546.03	719.618	12.5786	2	3092.06	2014	-1078.06	931	9353516			6.83626	-1078.06	-520.27																	9353516	-1078.06		0	1			Senegal	-851.299	-0.677386	1348
8	China	59.3	1441.9	752.621	11.6236	1.69	2436.81	2847.8	410.988	1752	1288400000			7.46851	410.988	604.187				2003	2011												1288400000	410.988		410.988	410.988			Malawi	-777.806	-0.741392	514
10	congo rep	61.2	1483.6	721.973	12.4448	2	2967.19	2206.6	-760.594	1025	3331564			6.93245	-760.594	-258.268																	3331564	-760.594		0	1			congo rep	-760.594	-0.758169	1025
11	Cote d'Ivoire	64	1525.4	727.27	12.4708	2	3050.81	2700.8	-350.006	1184	17491539			7.07665	-350.006	69.1629	estimates from R script	CONSTANT		-4499.98	n/a												17491539	-350.006		0	1			Pakistan	-722.188	-0.798488	2049
12	Croatia	75.3	1582.93	741.302	11.177	1.4	2216.1	2869.6	653.5	9077	4440000			9.1135	653.5	-101.895		SLOPE		576.658	n/a												4440000	653.5		653.5	653.5			Mali	-647.533	-0.890547	764
13	CzechRep	76	1601.7	741.885	11.3134	1.4	2242.38	3274.2	1031.82	13145	10193998			9.4838	1031.82	62.8897		r2		0.834965	n/a												10193998	1031.82		1031.82	1031.82			Burkina Faso	-605.943	-0.951671	847
14	Denmark	75.1	1580.34	747.901	11.0844	1.4	2212.48	3367.2	1154.72	21478	5390574			9.97478	1154.72	-97.3408		THRESHOLD INCOME		2449.27	n/a				2003	2011							5390574	1154.72		1154.72	1154.72			Ecuador	-455.282	-1.2666	4524
16	Ecuador	73.9	1626.44	733.123	12.0882	1.69	2748.68	2293.4	-455.282	4524	13289600			8.41715	-455.282	-809.122		world/cap/day FW		525.727	727.409		US/cap/day FW		1481.89	1571.75							13289600	-455.282		0	1			Nepal	-382.157	-1.50896	909
17	Estonia	73.1	1558.98	738.812	11.2199	1.4	2182.58	3089.4	906.822	11275	1370720			9.33034	906.822	26.3816		world FW share		0.191941	0.253541		US FW sh		0.392034	0.429205							1370720	906.822		906.822	906.822			Swaziland	-356.373	-1.61813	3170
18	Ethiopia	57.2	1436.3	721.229	12.5013	2	2872.61	1883.4	-989.21	477	72432290			6.16752	-989.21	-45.7791		affluence elas		1.09688	0.792756		US income elas		0.389137	0.36689							72432290	-989.21		0	1			Mauritania	-350.143	-1.64692	1199
19	Finland	74.8	1578.95	747.3	11.1183	1.4	2210.53	3172.8	962.266	19505	5213014			9.87843	962.266	-234.231																	5213014	962.266		962.266	962.266			Cote d'Ivoire	-350.006	-1.64757	1184
20	France	67.2	1493.99	743.385	11.1698	1.4	2091.59	3595.4	1503.81	22314	62244884			10.013	1503.81	229.726																	62244884	1503.81		1503.81	1503.81			Namibia	-312.94	-1.84271	2737
21	Georgia	71.7	1552.71	737.079	11.3756	1.69	2624.07	2896.8	272.725	3142	4301000			8.05261	272.725	129.098																	4301000	272.725		272.725	272.725			laos	-140.246	-4.11176	1112
22	Germany	74.2	1561.99	745.853	10.9992	1.4	2186.79	3408.2	1221.41	21743	82534176			9.98705	1221.41	-37.7256																	82534176	1221.41		1221.41	1221.41			Bangladesh	-45.5468	-12.6608	1011
23	Ghana	60.5	1476.56	725.728	12.4104	1.69	2495.38	2606.2	110.819	963	20305396			6.87005	110.819	649.126																	20305396	110.819		110.819	110.819			India	-6.67187	-86.4313	1455
24	Greece	74.7	1575.99	736.184	11.2423	1.4	2206.38	3645.2	1438.82	18580	10928070			9.82984	1438.82	270.341																	10928070	1438.82		1438.82	1438.82			Philippines	31.7771	18.147	2200
26	Hungary	73.9	1569.2	738.498	11.241	1.4	2196.89	3138.2	941.314	12365	10129552			9.42263	941.314	7.65887																	10129552	941.314		941.314	941.314			Paraguay	35.5188	16.2353	3350
27	India	51.1	1356.14	736.047	12.1348	1.69	2291.87	2285.2	-6.67187	1455	1108369577			7.28276	-6.67187	293.643																	1108369577	-6.67187		0	1			Sri Lanka	45.2589	12.7413	2735
28	Israel	70.5	1559.05	735.175	11.6862	1.4	2182.67	3628.8	1446.13	16100	6689700			9.68657	1446.13	360.261																	6689700	1446.13		1446.13	1446.13			Ghana	110.819	5.20358	963
29	Italy	68.5	1497.04	742.535	11.0146	1.4	2095.85	3628.8	1532.95	19667	57313203			9.8867	1532.95	331.682																	57313203	1532.95		1532.95	1532.95			Vietnam	136.224	4.23315	1309
30	Kazakhstan	69.1	1552.1	739.749	11.7561	1.69	2623.04	2953	329.957	5426	14909018			8.59896	329.957	-128.723																	14909018	329.957		329.957	329.957			bosnia&herzegovina	264.262	2.18214	6437
31	Kenya	60.2	1481.69	715.827	12.722	2	2963.38	2055.2	-908.183	1207	33551079			7.09589	-908.183	-500.109																	33551079	-908.183		0	1			Georgia	272.725	2.11443	3142
32	laos	52.2	1371.86	722.576	12.4384	1.69	2318.45	2178.2	-140.246	1112	5579003			7.01392	-140.246	315.101																	5579003	-140.246		0	1			Malaysia	308.086	1.87175	5566
33	Latvia	74.7	1573.89	738.248	11.1866	1.4	2203.45	3026.4	822.953	9747	2287955			9.18471	822.953	26.4901																	2287955	822.953		822.953	822.953			Kazakhstan	329.957	1.74768	5426
34	Luxembourg	74.1	1573.83	751.818	11.0933	1.4	2203.36	3553.2	1349.84	33684	451630			10.4248	1349.84	-161.718																	451630	1349.84		1349.84	1349.84			China	410.988	1.4031	1752
35	Malawi	60.6	1482.2	714.761	12.6641	2	2964.41	2186.6	-777.806	514	12090476			6.24222	-777.806	122.545																	12090476	-777.806		0	1			Brazil	422.563	1.36467	5720
36	Malaysia	61	1476.87	739.935	12.0809	1.69	2495.91	2804	308.086	5566	24869423			8.62443	308.086	-165.285																	24869423	308.086		308.086	308.086			Russia	439.865	1.31099	7918
37	Mali	69.1	1587.77	716.795	12.6045	2	3175.53	2528	-647.533	764	12088867			6.63857	-647.533	24.2615																	12088867	-647.533		0	1			Mauritius	482.143	1.19603	7620
38	Mauritania	61.9	1494.97	725.736	12.4271	2	2989.94	2639.8	-350.143	1199	2974686			7.08924	-350.143	61.7664																	2974686	-350.143		0	1			Ukraine	492.32	1.17131	4657
39	Mauritius	62.6	1477.67	749.278	11.6356	1.69	2497.26	2979.4	482.143	7620	1213370			8.93853	482.143	-172.356																	1213370	482.143		482.143	482.143			South Africa	502.945	1.14656	5886
40	Mexico	66.7	1539.21	731.61	12.1079	1.4	2154.89	3093.4	938.505	8861	106888418			9.08941	938.505	196.998																	106888418	938.505		938.505	938.505			Morocco	593.846	0.971058	2250
41	Morocco	66.5	1535.59	730.693	12.1038	1.69	2595.15	3189	593.846	2250	29812685			7.71869	593.846	642.781																	29812685	593.846		593.846	593.846			Slovak	620.471	0.929388	11077
42	Namibia	63.9	1515.82	725.103	12.3743	1.69	2561.74	2248.8	-312.94	2737	1980531			7.91462	-312.94	-376.99																	1980531	-312.94		0	1			Tunisia	628.409	0.917648	4371
43	Nepal	51.6	1358.48	727.897	12.2206	2	2716.96	2334.8	-382.157	909	24868900			6.81235	-382.157	189.428																	24868900	-382.157		0	1			Uruguay	649.028	0.888495	7074
44	Netherlands	73.7	1570.83	753.28	11.0929	1.4	2199.16	3216.6	1017.44	22591	16225302			10.0253	1017.44	-263.753																	16225302	1017.44		1017.44	1017.44			Croatia	653.5	0.882416	9077
45	Norway	74.7	1581.39	747.056	11.1692	1.4	2213.95	3462.2	1248.25	24610	4564855			10.1109	1248.25	-82.3126																	4564855	1248.25		1248.25	1248.25			Latvia	822.953	0.700719	9747
46	Pakistan	64	1518.89	726.269	12.3848	2	3037.79	2315.6	-722.188	2049	147251530			7.62511	-722.188	-619.29																	147251530	-722.188		0	1			Slovenia	896.597	0.643164	14967
47	Paraguay	67.2	1553.66	729.624	12.2624	1.69	2625.68	2661.2	35.5188	3350	5607948			8.11672	35.5188	-145.073																	5607948	35.5188		35.5188	35.5188			Estonia	906.822	0.635911	11275
48	Philippines	55.4	1411.97	734.043	12.2369	1.69	2386.22	2418	31.7771	2200	82971734			7.69621	31.7771	93.672																	82971734	31.7771		31.7771	31.7771			Mexico	938.505	0.614444	8861
49	Portugal	69.8	1520.9	737.435	11.2244	1.4	2129.25	3560	1430.75	15289	10458821			9.63489	1430.75	374.686																	10458821	1430.75		1430.75	1430.75			Hungary	941.314	0.61261	12365
50	Russia	71.7	1556.29	742.616	11.3484	1.69	2630.13	3070	439.865	7918	144648257			8.97689	439.865	-236.756		UK affluence elast in 2003		0.46488													144648257	439.865		439.865	439.865			Sweden	958.246	0.601785	21818
51	Senegal	64.6	1528.05	715.836	12.573	2	3056.1	2204.8	-851.299	1348	10673320			7.20638	-851.299	-506.937		UK calories expenditure elas from DEFRA		0.985													10673320	-851.299		0	1			Finland	962.266	0.599271	19505
52	Slovak	71.4	1561.52	741.331	11.4873	1.4	2186.13	2806.6	620.471	11077	5373374			9.31263	620.471	-249.753		share of calories wasted in UK		0.362534													5373374	620.471		620.471	620.471			Netherlands	1017.44	0.566772	22591
53	Slovenia	73.8	1573.57	744.138	11.239	1.4	2203	3099.6	896.597	14967	1995733			9.6136	896.597	-147.188		corrected caloried elas using equation (3)		0.809609													1995733	896.597		896.597	896.597			CzechRep	1031.82	0.558875	13145
54	South Africa	58	1434.47	733.461	12.0864	1.69	2424.25	2927.2	502.945	5886	46034026			8.68033	502.945	-2.66042																	46034026	502.945		502.945	502.945			Turkey	1066.7	0.540603	5715
55	Spain	70.6	1533.9	739.848	11.2472	1.4	2147.47	3344.2	1196.73	19232	42187645			9.86433	1196.73	8.36587																	42187645	1196.73		1196.73	1196.73			Denmark	1154.72	0.499392	21478
56	Sri Lanka	52.5	1359.61	741.327	11.7768	1.69	2297.74	2343	45.2589	2735	19083000			7.91389	45.2589	-18.3698																	19083000	45.2589		45.2589	45.2589			Spain	1196.73	0.48186	19232
57	Swaziland	72.4	1628.98	716.21	12.6073	1.69	2752.97	2396.6	-356.373	3170	1087949			8.06149	-356.373	-505.117																	1087949	-356.373		0	1			Germany	1221.41	0.472126	21743
58	Sweden	73	1553.97	741.876	11.1245	1.4	2175.55	3133.8	958.246	21818	8958229			9.99049	958.246	-302.874																	8958229	958.246		958.246	958.246			uk	1240.45	0.46488	25159
59	Tunisia	67.4	1541.3	732.182	12.0047	1.69	2604.79	3233.2	628.409	4371	9839800			8.38275	628.409	294.408																	9839800	628.409		628.409	628.409			Norway	1248.25	0.461975	24610
60	Turkey	64.4	1503.49	733.153	11.9618	1.69	2540.9	3607.6	1066.7	5715	66060121			8.65085	1066.7	578.09																	66060121	1066.7		1066.7	1066.7			Luxembourg	1349.84	0.427206	33684
61	Ukraine	71.4	1542.3	739.059	11.2498	1.69	2606.48	3098.8	492.32	4657	47812950			8.44613	492.32	121.771																	47812950	492.32		492.32	492.32			Portugal	1430.75	0.403048	15289
63	uk	73	1557.97	743.633	11.1553	1.4	2181.15	3421.6	1240.45	25159	59647577			10.133	1240.45	-102.836																	59647577	1240.45		1240.45	1240.45			Greece	1438.82	0.400785	18580
64	Uruguay	71.8	1556.84	733.282	11.4701	1.4	2179.57	2828.6	649.028	7074	3325637			8.86418	649.028	37.404																	3325637	649.028		649.028	649.028			Israel	1446.13	0.398761	16100
65	Vietnam	50.6	1342	734.065	12.0145	1.69	2267.98	2404.2	136.224	1309	80467400			7.17702	136.224	497.517																	80467400	136.224		136.224	136.224			France	1503.81	0.383465	22314
66	Zambia	61	1489.11	712.115	12.7377	2	2978.23	1867.6	-1110.63	897	11426006			6.79906	-1110.63	-531.378																	11426006	-1110.63		0	1			Italy	1532.95	0.376176	19667
67	Zimbabwe	63.9	1528.2	707.76	12.8395	2	3056.41	2025.6	-1030.81	434	12774162			6.07304	-1030.81	-32.9011																	12774162	-1030.81		0	1			Austria	1577.63	0.365521	23444
63																																								Belgium	1607.73	0.358679	21656
														mean		-1.74681e-12																total world pop	6353976427				351.156
sample statistics	average	59.5437					2427.43	2703.72	276.293	4272.19				SD		318.568																sample population	4262957768				Sample FW/cap/day accounting for non-negative FW and sample pop
	min	50.6					2091.59	1867.6	-1110.63	434				correl		3.9566e-16
	max	76					3175.53	3757.2	1607.73	33684																											0.129879
	stdev	7.12422					328.069	524.526	790.58	8583.53																											Share of available calories wasted by consumers in sample countries
																																					475.404
																																					Sample standard deviation in FW

## Sheet: fig3_Global food waste in 2011
		TABLE D6 DETAILED RESULT: Real expenditures per capita (U.S. dollars)
	REAL EXPENDITURES PER CAPITA (US$) Economy			Actual individual consumption	FW
		(00)		(02)
1	AFRICA
2		Algeria		6270.19	542.068
3		Angola		4319.08	327.11
4		Benin		1473.07	-293.196
5		Botswana		6780.31	587.172
6		Burkina Faso		952.587	-544.576
7		Burundi		648.34	-766.455
8		Cameroon		2296.88	-37.0442
9		Cape Verde		4747.28	381.622
10		Central African Republic		869.318	-597.324
11		Chad		1476.17	-291.987
12		Comoros		621.45	-790.882
13		Congo, Rep.		1513.13	-277.726
14		Congo, Dem. Rep.		446.609	-981.393
15		Côte d'Ivoire		1979.25	-122.871
16		Djibouti		1719.4	-204.03
17		Egypt, Arab Rep.a		8529.31	719.507
18		Equatorial Guinea		4916.38	401.805
19		Ethiopia		978.858	-528.888
20		Gabon		5976.41	514.396
21		Gambia, The		1220.59	-401.617
22		Ghana		2241.9	-51.0163
23		Guinea		788.551	-653.556
24		Guinea-Bissau		927.594	-559.908
25		Kenya		1937.1	-135.285
26		Lesotho		2524.33	17.4053
27		Liberia		605.668	-805.716
28		Madagascar		1331.54	-351.448
29		Malawi		1005.96	-513.139
30		Mali		1046.75	-490.219
31		Mauritania		2089	-91.7485
32		Mauritius		11812.2	907.282
33		Morocco		4308.81	325.737
34		Mozambique		889.578	-584.039
35		Namibia		5827.04	499.801
36		Niger		719.377	-706.5
37		Nigeria		2074.58	-95.7431
38		Rwanda		1293.11	-368.333
39		São Tomé and Principe		3339.99	178.865
40		Senegal		1923.36	-139.389
41		Seychelles		13112.7	967.514
42		Sierra Leone		1193.6	-414.512
43		South Africa		8279.74	702.382
44		Sudanb		2308.88	-34.0386
45		Swaziland		5821.76	499.277
46		Tanzania		1029.23	-499.951
47		Togo		1193.22	-414.696
48		Tunisia		7289.73	628.947
49		Uganda		1390.09	-326.633
50		Zambia		1778.18	-184.646
51		Zimbabwe		1349.19	-343.856
52	Total		50	2785.9	74.2623
53
54	ASIA AND THE PACIFIC
55		Bangladesh		2138.05	-78.3657
56		Bhutan		3997.96	282.559
57		Brunei Darussalam		15683.3	1070.74
58		Cambodia		2277.1	-42.0305
59		Chinac		4330.57	328.643
60		Fiji		5397.37	455.629
61		Hong Kong SAR, China		32690.2	1494.29
62		India		3022.67	121.3
63		Indonesia		4805.37	388.635
64		Lao PDR		2340.78	-26.1266
65		Macao SAR, China		23648.5	1307.58
66		Malaysia		11082	870.485
67		Maldives		3882.83	265.708
68		Mongolia		5501.45	466.644
69		Myanmar		2272.85	-43.1096
70		Nepal		1847.51	-162.59
71		Pakistan		3925.87	272.065
72		Philippines		4490.27	349.526
73		Singapore		24724.6	1333.24
74		Sri Lanka		6393.48	553.296
75		Taiwan, China		25128.8	1342.59
76		Thailand		8477.12	715.967
77		Vietnam		2990.94	115.215
78	Total		23	4083.41	294.754
79
80	COMMONWEALTH OF INDEPENDENT STATES
81		Armenia		7303.68	630.049
82		Azerbaijan		8365.73	708.34
83		Belarus		11576.2	895.641
84		Kazakhstan		11411.5	887.38
85		Kyrgyzstan		3505.9	206.821
86		Moldova		5653.37	482.352
87		Russian Federationd		15175	1051.75
88		Tajikistan		3024.82	121.71
89		Ukraine		7906.8	675.804
90	Total		9	12285.9	929.953
91
92	EUROSTAT-OECD
93		Albania		8115.91	690.857
94		Australia		27089.3	1385.91
95		Austria		27676.7	1398.28
96		Belgium		26250.4	1367.77
97		Bosnia and Herzegovina		8467.63	715.321
98		Bulgaria		10970.2	864.639
99		Canada		27433.5	1393.19
100		Chile		13703.4	992.919
101		Croatia		13739.8	994.449
102		Cyprus		22956.7	1290.46
103		Czech Republic		16630.8	1104.57
104		Denmark		26288.5	1368.61
105		Estonia		13795.1	996.768
106		Finland		26581.6	1375
107		France		26486.2	1372.93
108		Germany		28478	1414.74
109		Greece		21253.9	1246.02
110		Hungary		14663.9	1031.99
111		Iceland		25838.7	1358.65
112		Ireland		23042.6	1292.61
113		Israel		20482.8	1224.7
114		Italy		23875.3	1313.08
115		Japan		24447.4	1326.74
116		Korea, Rep.		17481.3	1133.33
117		Latvia		13734.3	994.219
118		Lithuania		16536.9	1101.3
119		Luxembourg		31999.6	1481.97
120		Macedonia, FYR		9482.37	780.59
121		Malta		19700.9	1202.26
122		Mexico		11843.6	908.811
123		Montenegro		12314.8	931.307
124		Netherlands		25982.6	1361.86
125		New Zealand		22501.5	1278.91
126		Norway		31013.7	1463.93
127		Poland		16307.4	1093.24
128		Portugal		18584	1168.61
129		Romania		11183.8	875.757
130		Russian Federationd		15175	1051.75
131		Serbia		10107.4	817.399
132		Slovakia		16880.3	1113.15
133		Slovenia		18880.1	1177.72
134		Spain		21484.3	1252.23
135		Sweden		26781.4	1379.32
136		Switzerland		29464.7	1434.38
137		Turkey		13731.9	994.119
138		United Kingdom		26146.3	1365.48
139		United States		37389.8	1571.74
140	Total		47	23930.2	1314.41
141
142	LATIN AMERICA
143		Bolivia		3660.57	231.717
144		Brazil		9906.15	805.802
145		Colombia		7836.08	670.624
146		Costa Rica		10243.6	825.119
147		Cubae		…
148		Dominican Republic		9721.59	794.957
149		Ecuador		6759.05	585.361
150		El Salvador		7285.41	628.605
151		Guatemala		6222.08	537.626
152		Haiti		1688.08	-214.632
153		Honduras		3748.48	245.403
154		Nicaragua		3586.57	219.941
155		Panama		10618.2	845.832
156		Paraguay		5591.34	475.99
157		Peru		7147.68	617.599
158		Uruguay		12898.9	958.033
159		Venezuela, RB		10262.7	826.191
160	Total		17	8560.65	721.622
161
162	CARIBBEAN
163		Anguilla		21118.7	1242.34
164		Antigua and Barbuda		12549.5	942.194
165		Aruba		24000	1316.09
166		Bahamas, The		15565.3	1066.39
167		Barbados		12326.2	931.844
168		Belize		6491.85	562.101
169		Bermuda		37924.2	1579.93
170		Bonairef		…
171		Cayman Islands		34020.4	1517.29
172		Curaçao		20689.8	1230.5
173		Dominica		8663.95	728.539
174		Grenada		10210.8	823.271
175		Jamaica		7240.89	625.071
176		Montserrat		13609.4	988.953
177		St. Kitts and Nevis		14443.7	1023.26
178		St. Lucia		7520.25	646.901
179		St. Vincent and the Grenadines		8355.93	707.664
180		Sint Maarten		19297.6	1190.33
181		Suriname		5912.54	508.2
182		Trinidad and Tobago		15691.2	1071.03
183		Turks and Caicos Islands		7592.62	652.423
184		Virgin Islands, British		10753.1	853.112
185	Total		22	10867.4	859.209
186
187	WESTERN ASIA
188		Bahrain		18626.3	1169.91
189		Egypt, Arab Rep.a		8529.31	719.507
190		Iraq		5380.68	453.844
191		Jordan		8867.85	741.953
192		Kuwait		21888.4	1262.98
193		Oman		15182.2	1052.02
194		Palestinian Territory		4070.32	292.903
195		Qatar		20552.2	1226.65
196		Saudi Arabia		17796.8	1143.65
197		Sudanb		2308.88	-34.0386
198		United Arab Emirates		29462.7	1434.34
199		Yemen		2762.41	69.3783
200	Total		12	8573.55	722.49
201
202	SINGLETONS
203		Georgia		6054.3	521.863
204		Iran, Islamic Rep.		8576.49	722.688
205	Total		2	8434.91	713.089
206
207	WORLDg		179	8646.71	727.39

## Sheet: eq1_countryspecificcoefficients
Table from FAO report[13] on human energy requirements	10-18	18-30	30-60	>=60		10-18	18-30	30-60	>=60
country generic C	692.6	486.6	845.6	658.5		658.2	692.2	873.1	587.7
country generic A	13.384	14.818	8.126	9.082		17.686	15.057	11.472	11.711
populationdata from World Bank	% OF ADULT POP_FEMALE AND 15-19	% OF ADULT POP_FEMALE AND 20-29	% OF ADULT POP_FEMALE AND 30-59	% OF ADULT POP_FEMALE AND ABOVE 60		% OF ADULT POP_MALE AND 15-19	% OF ADULT POP_MALE AND 20-29	% OF ADULT POP_MALE AND 30-59	% OF ADULT POP_MALE AND ABOVE 60		country specific C	country specific A
Austria	3.51662	7.32795	26.0964	15.0057		3.67042	7.48038	26.3046	10.5979		747.385	11.0742
Bangladesh	8.32574	14.2679	21.6004	4.83041		8.67828	14.5712	22.6805	5.04555		727.211	12.3441
Belgium	3.53697	7.50364	25.4443	15.0457		3.67924	7.60846	25.8548	11.327		744.432	11.1082
bosnia&herzegovina	4.62785	8.68949	25.7126	11.4928		4.90347	9.18084	26.6801	8.71288		747.415	11.3709
Brazil	6.75806	12.7476	25.3134	6.43493		6.9486	12.817	23.9494	5.03105		738.385	11.9303
Burkina Faso	10.1816	15.6035	21.5959	4.73567		10.4676	15.6805	18.6334	3.10177		718.6	12.573
Chad	10.2857	15.1066	20.6181	4.55304		10.4264	15.2289	19.8804	3.90095		719.618	12.5786
China	5.85232	9.66792	26.7336	6.75427		6.27653	10.2216	27.9334	6.5604		752.621	11.6236
congo rep	9.00998	15.1129	21.1052	5.10056		9.10109	15.256	20.918	4.39634		721.973	12.4448
Cote d'Ivoire	9.10717	14.4239	20.2295	3.8361		9.20286	14.7143	23.7725	4.71371		727.27	12.4708
Croatia	3.9203	7.94841	25.0243	15.5837		4.08606	8.22264	24.6957	10.5188		741.302	11.177
CzechRep	3.69252	9.51706	25.369	13.2638		3.87347	9.92039	25.2341	9.12972		741.885	11.3134
Denmark	3.25939	7.45888	26.1243	14.0856		3.41819	7.58991	26.8514	11.2123		747.901	11.0844
Ecuador	7.51928	13.0831	23.5952	6.12084		7.74439	13.2823	23.2085	5.4464		733.123	12.0882
Estonia	4.38799	8.25706	25.132	16.6049		4.69812	8.69399	23.086	9.13994		738.812	11.2199
Ethiopia	9.94869	14.8369	21.2609	4.63106		10.0373	14.8004	20.126	4.35869		721.229	12.5013
Finland	3.6692	7.42992	25.8616	14.6178		3.84079	7.77628	26.4129	10.3916		747.3	11.1183
France	3.93322	7.77687	25.5369	14.4478		4.0692	7.89051	25.3044	11.0411		743.385	11.1698
Georgia	5.23845	9.31543	25.5578	13.7254		5.35525	8.92634	22.6234	9.25798		737.079	11.3756
Germany	3.35815	6.40308	25.2515	16.4498		3.51646	6.67683	26.2359	12.1083		745.853	10.9992
Ghana	9.08972	14.7814	21.9642	4.56925		9.29865	14.6932	21.5999	4.00373		725.728	12.4104
Greece	3.44008	8.47565	24.144	14.9391		3.70264	9.11079	23.9903	12.1974		736.184	11.2423
Hungary	3.64702	9.13025	25.1007	15.3338		3.79639	9.51433	23.8237	9.65381		738.498	11.241
India	7.40799	12.6143	22.9459	5.55056		8.01016	13.6514	24.6353	5.18439		736.047	12.1348
Israel	5.68755	11.0123	24.5045	10.2478		5.93049	11.5565	23.1017	7.95921		735.175	11.6862
Italy	2.87898	7.23332	25.4765	16.2872		3.03689	7.50175	25.197	12.3883		742.535	11.0146
Kazakhstan	6.83121	11.4266	25.9099	8.94237		6.95391	11.356	23.3051	5.27489		739.749	11.7561
Kenya	10.6794	16.1073	19.7849	3.80102		10.7478	16.2847	19.2355	3.35939		715.827	12.722
laos	9.75957	14.621	21.7418	5.15523		9.91059	14.3755	20.2132	4.22317		722.576	12.4384
Latvia	4.52207	8.08564	25.2115	17.2564		4.72641	8.31065	22.6786	9.20875		738.248	11.1866
Luxembourg	3.4465	7.50799	26.8639	13.377		3.60514	7.67104	27.6042	9.92418		751.818	11.0933
Malawi	10.6063	15.776	19.4564	4.8222		10.4841	15.8057	19.0554	3.99394		714.761	12.6641
Malaysia	7.44654	12.4951	24.0409	5.00546		7.85659	13.1907	25.2888	4.67809		739.935	12.0809
Mali	9.8761	15.4519	20.4805	4.83394		10.3368	16.0531	18.9393	4.02839		716.795	12.6045
Mauritania	9.04917	14.6824	21.8224	4.73583		9.35412	15.175	21.4792	3.7018		725.736	12.4271
Mauritius	5.222	11.4564	27.1022	7.04897		5.33554	11.4749	26.9943	5.36561		749.278	11.6356
Mexico	7.38688	13.8066	23.6556	6.06497		7.56731	13.5811	22.877	5.06048		731.61	12.1079
Morocco	7.85635	13.5665	23.538	6.455		7.96221	12.8905	22.4628	5.26866		730.693	12.1038
Namibia	9.09783	15.1199	22.8622	4.74171		9.00772	14.8468	20.6594	3.66457		725.103	12.3743
Nepal	8.76951	14.386	22.4329	5.76472		8.26847	12.8948	22.5305	4.95318		727.897	12.2206
Netherlands	3.54586	7.35673	27.2336	12.7749		3.69748	7.52716	27.8714	9.99286		753.28	11.0929
Norway	3.75631	7.75146	25.7554	13.6453		3.93333	7.92876	26.6678	10.5616		747.056	11.1692
Pakistan	9.00164	13.4562	21.0712	4.97084		9.51733	14.2118	22.1819	5.58904		726.269	12.3848
Paraguay	8.56302	13.3136	22.0269	5.62199		8.82554	13.7209	22.7939	5.13413		729.624	12.2624
Philippines	8.33291	13.6652	23.5453	4.73303		8.66107	14.0077	23.3352	3.71955		734.043	12.2369
Portugal	3.52607	8.81718	24.8972	14.9329		3.6846	9.03991	23.8695	11.2326		737.435	11.2244
Russia	5.09871	9.13321	26.1228	13.8874		5.29348	9.28518	23.8833	7.29588		742.616	11.3484
Senegal	10.2129	15.8694	21.0771	4.84667		10.2871	15.2534	18.39	4.06348		715.836	12.573
Slovak	4.73534	10.3	25.3898	11.6298		4.93181	10.6852	24.7792	7.54886		741.331	11.4873
Slovenia	3.79133	8.5087	25.1756	14.1747		3.94873	9.0054	25.8953	9.50028		744.138	11.239
South Africa	8.06026	13.8607	24.8304	5.725		8.06173	12.6343	22.5443	4.28333		733.461	12.0864
Spain	3.23331	8.99294	24.7804	14.1335		3.42616	9.50153	25.0837	10.8485		739.848	11.2472
Sri Lanka	6.09737	11.8864	25.8815	7.05272		6.24269	11.7768	24.8068	6.25562		741.327	11.7768
Swaziland	11.2733	15.3559	21.2648	4.71826		11.3251	14.4341	17.8554	3.77316		716.21	12.6073
Sweden	3.6632	7.1613	24.6723	15.3799		3.85863	7.43592	25.4251	12.4036		741.876	11.1245
Tunisia	7.28805	12.6621	23.6472	6.90536		7.48343	12.4134	22.9555	6.64501		732.182	12.0047
Turkey	6.83642	13.0615	24.6263	6.98897		6.95814	13.0154	22.6072	5.90613		733.153	11.9618
Ukraine	4.33003	8.89645	25.5166	15.6961		4.55366	8.99025	23.2254	8.7914		739.059	11.2498
UK	3.8989	7.6708	25.7603	14.3589		4.09187	7.69747	25.2516	11.2702		743.633	11.1553
Uruguay	4.91872	9.91402	24.006	13.7043		5.09998	10.1351	22.6504	9.57135		733.282	11.4701
Vietnam	7.33856	12.9002	24.0017	7.30894		7.56473	13.0164	23.0198	4.84962		734.065	12.0145
Zambia	10.5849	16.4403	19.1585	4.51572		10.6247	16.5428	18.4119	3.72117		712.115	12.7377
Zimbabwe	11.2028	16.9968	18.0576	4.45012		11.0784	16.6693	17.7087	3.83628		707.76	12.8395

## Sheet: PALs
	lower bound	upper bound	PAL		Cutoffs derived from http://www.hdr.undp.org/en/composite/HDI
low	0	0.55	2
med	0.551	0.699	1.69
high	0.7	1	1.4
	HDI_2003	PAL based on HDI
Austria	0.842	1.4
Bangladesh	0.56	1.69
Belgium	0.882	1.4
bosnia&herzegovina	0.688	1.69
Brazil	0.695	1.69
Burkina Faso	0.303	2
Chad	0.309	2
China	0.623	1.69
congo rep	0.498	2
Cote d'Ivoire	0.402	2
Croatia	0.771	1.4
CzechRep	0.822	1.4
Denmark	0.894	1.4
Ecuador	0.682	1.69
Estonia	0.806	1.4
Ethiopia	0.31	2
Finland	0.87	1.4
France	0.857	1.4
Georgia	0.693	1.69
Germany	0.889	1.4
Ghana	0.561	1.69
Greece	0.825	1.4
Hungary	0.792	1.4
India	0.63	1.69
Israel	0.865	1.4
Italy	0.847	1.4
Kazakhstan	0.69	1.69
Kenya	0.468	2
laos	0.551	1.69
Latvia	0.774	1.4
Luxembourg	0.864	1.4
Malawi	0.374	2
Malaysia	0.68	1.69
Mali	0.343	2
Mauritania	0.451	2
Mauritius	0.695	1.69
Mexico	0.717	1.4
Morocco	0.563	1.69
Namibia	0.556	1.69
Nepal	0.462	2
Netherlands	0.883	1.4
Norway	0.924	1.4
Pakistan	0.473	2
Paraguay	0.64	1.69
Philippines	0.637	1.69
Portugal	0.796	1.4
Russia	0.69	1.69
Senegal	0.407	2
Slovak	0.777	1.4
Slovenia	0.85	1.4
South Africa	0.615	1.69
Spain	0.833	1.4
Sri Lanka	0.67	1.69
Swaziland	0.551	1.69
Sweden	0.908	1.4
Tunisia	0.673	1.69
Turkey	0.679	1.69
Ukraine	0.699	1.69
uk	0.878	1.4
Uruguay	0.75	1.4
Vietnam	0.603	1.69
Zambia	0.46	2
Zimbabwe	0.428	2

## Sheet: HDI
Human Development Index (HDI)	1		2	3	4	5	6	7	8	9	10	11	12	13	14	15	16	17	18	19	20	21	22	23	24	25	26	27	28	29	30	31	32	33	34	35	36	37	38	39	40	41	42	43	44	45	46	47	48
HDI Rank	Country		1990		1991		1992		1993		1994		1995		1996		1997		1998		1999		2000		2001		2002		2003		2004		2005		2006		2007		2008		2009		2010		2011		2012		2013
168	Afghanistan	Afghanistan																									0.373		0.383		0.398		0.408		0.417		0.429		0.437		0.453		0.463		0.471		0.482		0.487
68	Albania	Albania	0.645		0.626		0.61		0.613		0.619		0.632		0.641		0.641		0.652		0.662		0.669		0.676		0.682		0.689		0.694		0.704		0.711		0.72		0.724		0.729		0.741		0.752		0.767		0.771
85	Algeria	Algeria	0.577		0.581		0.587		0.591		0.595		0.6		0.608		0.617		0.627		0.636		0.644		0.653		0.664		0.674		0.684		0.692		0.698		0.707		0.709		0.719		0.729		0.736		0.74		0.745
35	Andorra	Andorra																					0.759		0.767		0.78		0.82		0.826		0.819		0.829		0.829		0.831		0.83		0.828		0.827		0.849		0.85
147	Angola	Angola																			0.374		0.387		0.401		0.418		0.429		0.442		0.455		0.471		0.492		0.502		0.522		0.52		0.535		0.543		0.554
70	Antigua and Barbuda	Antigua and Barbuda																															0.766		0.772		0.778		0.777		0.77		0.766		0.762		0.765		0.768
47	Argentina	Argentina	0.704		0.713		0.72		0.725		0.728		0.731		0.738		0.746		0.753		0.764		0.771		0.776		0.769		0.775		0.78		0.782		0.787		0.792		0.795		0.799		0.813		0.819		0.818		0.82
83	Armenia	Armenia	0.631		0.628		0.58		0.588		0.599		0.605		0.612		0.623		0.636		0.642		0.647		0.652		0.663		0.672		0.68		0.693		0.706		0.72		0.727		0.724		0.728		0.731		0.737		0.742
3	Australia	Australia	0.866		0.867		0.868		0.872		0.875		0.883		0.886		0.889		0.892		0.895		0.898		0.9		0.903		0.904		0.907		0.908		0.911		0.915		0.92		0.921		0.923		0.925		0.929		0.931
20	Austria	Austria	0.795		0.8		0.805		0.807		0.813		0.817		0.82		0.824		0.835		0.834		0.838		0.849		0.838		0.842		0.849		0.855		0.861		0.881		0.884		0.886		0.895		0.897		0.899		0.897
80	Azerbaijan	Azerbaijan											0.612		0.612		0.617		0.626		0.633		0.64		0.648		0.657		0.666		0.674		0.679		0.704		0.709		0.719		0.736		0.74		0.741		0.745		0.752
54	Bahamas	Bahamas																					0.776		0.779		0.781		0.782		0.784		0.786		0.788		0.789		0.79		0.787		0.789		0.793		0.807		0.807
43	Bahrain	Bahrain	0.746		0.752		0.757		0.765		0.769		0.775		0.778		0.779		0.783		0.786		0.792		0.792		0.791		0.793		0.792		0.791		0.793		0.796		0.796		0.794		0.796		0.798		0.8		0.807
136	Bangladesh	Bangladesh	0.387		0.394		0.402		0.409		0.417		0.425		0.433		0.442		0.451		0.46		0.468		0.477		0.483		0.56		0.497		0.505		0.513		0.52		0.523		0.535		0.545		0.557		0.567		0.575
58	Barbados	Barbados	0.716		0.718		0.718		0.721		0.727		0.731		0.735		0.74		0.736		0.743		0.752		0.751		0.754		0.759		0.762		0.767		0.772		0.777		0.781		0.783		0.782		0.787		0.795		0.796
53	Belarus	Belarus											0.657		0.661		0.667		0.671		0.676		0.683		0.689		0.696		0.705		0.715		0.725		0.741		0.757		0.774		0.784		0.792		0.798		0.803		0.804
17	Belgium	Belgium	0.806		0.81		0.825		0.839		0.845		0.852		0.857		0.862		0.866		0.868		0.873		0.876		0.879		0.882		0.885		0.889		0.896		0.899		0.899		0.899		0.903		0.904		0.905		0.908
106	Belize	Belize	0.644		0.651		0.657		0.661		0.661		0.662		0.662		0.664		0.666		0.67		0.677		0.679		0.685		0.692		0.696		0.693		0.7		0.699		0.7		0.699		0.699		0.702		0.706		0.705
163	Benin	Benin	0.348		0.354		0.358		0.365		0.368		0.373		0.377		0.381		0.385		0.391		0.398		0.41		0.419		0.426		0.434		0.44		0.447		0.455		0.462		0.468		0.473		0.479		0.489		0.5
134	Bhutan	Bhutan																															0.51		0.521		0.535		0.543		0.554		0.566		0.575		0.585		0.589
118	Bolivia (Plurinational State of)	Bolivia (Plurinational State of)	0.536		0.543		0.55		0.557		0.564		0.571		0.578		0.58		0.591		0.6		0.608		0.611		0.617		0.621		0.622		0.624		0.63		0.631		0.64		0.647		0.649		0.655		0.662		0.668
77	Bosnia and Herzegovina	bosnia&herzegovina																					0.672		0.677		0.683		0.688		0.694		0.7		0.706		0.712		0.719		0.72		0.713		0.721		0.739		0.747
101	Botswana	Botswana	0.581		0.588		0.587		0.585		0.575		0.577		0.571		0.57		0.567		0.566		0.565		0.567		0.566		0.575		0.584		0.596		0.611		0.625		0.639		0.648		0.66		0.673		0.683		0.693
79	Brazil	Brazil	0.611		0.615		0.622		0.63		0.64		0.648		0.656		0.664		0.67		0.676		0.684		0.691		0.698		0.695		0.698		0.7		0.702		0.705		0.716		0.718		0.727		0.731		0.736		0.748
39	Brunei Darussalam	Brunei Darussalam	0.782		0.787		0.792		0.797		0.801		0.805		0.807		0.81		0.812		0.818		0.819		0.82		0.823		0.828		0.834		0.838		0.84		0.84		0.84		0.842		0.842		0.846		0.852		0.853
51	Bulgaria	Bulgaria	0.694		0.691		0.691		0.69		0.691		0.696		0.702		0.704		0.709		0.708		0.712		0.722		0.729		0.738		0.745		0.75		0.756		0.764		0.771		0.774		0.779		0.782		0.786		0.792
183	Burkina Faso	Burkina Faso																					0.286		0.29		0.296		0.303		0.312		0.324		0.333		0.344		0.357		0.366		0.375		0.385		0.394		0.401
185	Burundi	Burundi	0.297		0.3		0.297		0.299		0.298		0.296		0.294		0.296		0.3		0.3		0.303		0.302		0.31		0.316		0.324		0.33		0.35		0.361		0.372		0.387		0.395		0.403		0.408		0.414
125	Cabo Verde	Cabo Verde																					0.57		0.575		0.585		0.589		0.592		0.598		0.613		0.619		0.625		0.626		0.629		0.635		0.636		0.642
146	Cambodia	Cambodia	0.364		0.368		0.373		0.377		0.38		0.387		0.391		0.397		0.402		0.407		0.42		0.434		0.453		0.466		0.478		0.49		0.502		0.513		0.521		0.521		0.537		0.546		0.553		0.56
151	Cameroon	Cameroon	0.44		0.436		0.432		0.426		0.423		0.422		0.422		0.422		0.428		0.426		0.431		0.448		0.451		0.458		0.464		0.466		0.472		0.484		0.492		0.499		0.506		0.515		0.526		0.535
12	Canada	Canada	0.849		0.853		0.856		0.854		0.859		0.861		0.863		0.862		0.861		0.864		0.867		0.872		0.877		0.882		0.887		0.892		0.895		0.897		0.899		0.899		0.902		0.905		0.908		0.911
188	Central African Republic	Central African Republic	0.317		0.312		0.299		0.299		0.301		0.303		0.3		0.302		0.304		0.308		0.309		0.311		0.312		0.311		0.315		0.319		0.325		0.331		0.337		0.343		0.351		0.358		0.365		0.344
186	Chad	Chad																					0.299		0.306		0.311		0.309		0.323		0.33		0.332		0.342		0.348		0.363		0.371		0.382		0.391		0.397
44	Chile	Chile	0.701		0.711		0.719		0.713		0.718		0.727		0.734		0.741		0.747		0.753		0.759		0.766		0.768		0.774		0.783		0.788		0.788		0.795		0.806		0.804		0.808		0.814		0.819		0.828
86	China	China	0.502		0.51		0.521		0.531		0.541		0.55		0.559		0.568		0.576		0.585		0.594		0.602		0.611		0.623		0.635		0.647		0.661		0.675		0.685		0.694		0.706		0.714		0.722		0.729
90	Colombia	Colombia	0.592		0.595		0.606		0.612		0.619		0.625		0.634		0.642		0.649		0.649		0.653		0.656		0.658		0.657		0.671		0.683		0.691		0.704		0.71		0.715		0.719		0.725		0.725		0.735
165	Comoros	Comoros																													0.449		0.455		0.461		0.466		0.47		0.476		0.482		0.487		0.493		0.499
137	Congo	congo rep	0.536		0.535		0.535		0.528		0.524		0.507		0.504		0.505		0.509		0.496		0.49		0.495		0.497		0.498		0.501		0.5		0.503		0.52		0.536		0.55		0.557		0.56		0.573		0.582
176	Congo (Democratic Republic of the)	Congo (Democratic Republic of the)	0.356		0.353				0.34		0.334		0.333		0.337		0.334		0.334		0.331		0.333		0.333		0.34		0.349		0.357		0.364		0.372		0.379		0.39		0.397		0.407		0.415		0.42		0.426
63	Costa Rica	Costa Rica	0.656		0.661		0.67		0.677		0.682		0.687		0.691		0.697		0.703		0.707		0.711		0.714		0.717		0.721		0.725		0.728		0.734		0.742		0.75		0.752		0.754		0.76		0.772		0.776
46	Croatia	Croatia	0.67		0.665		0.664		0.666		0.68		0.696		0.709		0.719		0.731		0.739		0.75		0.759		0.766		0.771		0.778		0.783		0.793		0.8		0.803		0.802		0.808		0.815		0.816		0.821
73	Cuba	Cuba	0.676		0.67		0.663		0.656		0.652		0.654		0.665		0.669		0.672		0.679		0.686		0.692		0.694		0.704		0.718		0.731		0.753		0.77		0.78		0.782		0.779		0.778		0.767		0.765
32	Cyprus	Cyprus	0.732		0.735		0.74		0.777		0.781		0.786		0.789		0.792		0.8		0.799		0.802		0.807		0.816		0.824		0.828		0.831		0.837		0.846		0.852		0.856		0.85		0.853		0.852		0.853
27	Czechia	CzechRep	0.73		0.726		0.728		0.735		0.744		0.753		0.768		0.774		0.775		0.785		0.796		0.806		0.813		0.822		0.825		0.835		0.843		0.85		0.854		0.857		0.862		0.865		0.865		0.874
170	Côte d'Ivoire	Cote d'Ivoire	0.388		0.387		0.387		0.386		0.386		0.387		0.388		0.391		0.389		0.392		0.394		0.396		0.399		0.402		0.407		0.413		0.418		0.424		0.43		0.437		0.442		0.445		0.454		0.462
11	Denmark	Denmark	0.799		0.804		0.809		0.815		0.824		0.831		0.837		0.843		0.849		0.861		0.863		0.876		0.883		0.894		0.898		0.903		0.905		0.904		0.909		0.906		0.91		0.922		0.924		0.931
172	Djibouti	Djibouti											0.355		0.353		0.357		0.359		0.362		0.363		0.372		0.378		0.388		0.396		0.405		0.416		0.426		0.435		0.441		0.449		0.454		0.459		0.463
103	Dominica	Dominica																					0.693		0.697		0.696		0.702		0.704		0.705		0.711		0.715		0.72		0.72		0.722		0.722		0.721		0.721
94	Dominican Republic	Dominican Republic	0.598		0.603		0.612		0.618		0.623		0.629		0.635		0.641		0.646		0.651		0.657		0.66		0.664		0.666		0.668		0.675		0.682		0.691		0.695		0.696		0.703		0.706		0.71		0.713
86	Ecuador	Ecuador	0.643		0.646		0.65		0.654		0.658		0.662		0.664		0.668		0.671		0.668		0.67		0.675		0.679		0.682		0.688		0.693		0.696		0.698		0.711		0.712		0.715		0.721		0.726		0.734
115	Egypt	Egypt	0.546		0.55		0.557		0.562		0.569		0.576		0.584		0.591		0.592		0.605		0.611		0.616		0.62		0.622		0.628		0.634		0.642		0.65		0.658		0.66		0.665		0.668		0.675		0.68
121	El Salvador	El Salvador	0.529		0.534		0.546		0.557		0.567		0.577		0.585		0.595		0.604		0.607		0.615		0.62		0.628		0.635		0.643		0.651		0.659		0.656		0.659		0.659		0.671		0.666		0.67		0.671
141	Equatorial Guinea	Equatorial Guinea																					0.516		0.532		0.525		0.539		0.53		0.567		0.578		0.585		0.586		0.589		0.581		0.584		0.589		0.59
179	Eritrea	Eritrea																															0.408		0.409		0.411		0.407		0.416		0.416		0.417		0.422		0.425
30	Estonia	Estonia	0.733		0.728		0.719		0.712		0.716		0.727		0.738		0.751		0.763		0.769		0.78		0.79		0.799		0.806		0.814		0.825		0.832		0.839		0.841		0.839		0.845		0.853		0.859		0.862
144	Eswatini (Kingdom of)	Swaziland	0.536		0.537		0.536		0.531		0.524		0.52		0.513		0.504		0.492		0.483		0.471		0.464		0.455		0.551		0.465		0.48		0.496		0.507		0.517		0.527		0.538		0.55		0.561		0.572
173	Ethiopia	Ethiopia																					0.283		0.298		0.306		0.31		0.325		0.346		0.362		0.378		0.394		0.401		0.412		0.423		0.43		0.438
92	Fiji	Fiji	0.643		0.651		0.655		0.659		0.666		0.673		0.676		0.675		0.676		0.681		0.683		0.687		0.689		0.691		0.699		0.695		0.698		0.702		0.703		0.707		0.711		0.717		0.719		0.727
15	Finland	Finland	0.784		0.787		0.795		0.799		0.809		0.816		0.823		0.832		0.84		0.848		0.858		0.864		0.867		0.87		0.891		0.895		0.899		0.901		0.904		0.899		0.903		0.907		0.908		0.912
24	France	France	0.779		0.788		0.798		0.804		0.818		0.825		0.83		0.834		0.839		0.845		0.849		0.851		0.853		0.857		0.86		0.869		0.874		0.876		0.878		0.878		0.882		0.884		0.886		0.889
110	Gabon	Gabon	0.62		0.625		0.624		0.626		0.63		0.632		0.634		0.637		0.64		0.636		0.633		0.636		0.639		0.641		0.641		0.647		0.647		0.652		0.653		0.661		0.665		0.67		0.678		0.687
174	Gambia	Gambia	0.333		0.337		0.342		0.346		0.349		0.353		0.36		0.364		0.371		0.378		0.385		0.393		0.397		0.403		0.412		0.416		0.421		0.427		0.435		0.438		0.441		0.44		0.445		0.453
70	Georgia	Georgia																					0.673		0.678		0.684		0.693		0.701		0.712		0.718		0.73		0.728		0.731		0.735		0.741		0.75		0.757
5	Germany	Germany	0.801		0.809		0.814		0.824		0.829		0.834		0.839		0.844		0.85		0.855		0.868		0.877		0.883		0.889		0.897		0.903		0.911		0.915		0.917		0.917		0.921		0.926		0.928		0.928
140	Ghana	Ghana	0.455		0.46		0.464		0.468		0.47		0.473		0.474		0.476		0.477		0.48		0.484		0.483		0.489		0.561		0.498		0.509		0.519		0.53		0.542		0.547		0.554		0.563		0.57		0.577
31	Greece	Greece	0.753		0.763		0.764		0.762		0.766		0.768		0.772		0.777		0.787		0.789		0.796		0.806		0.818		0.825		0.835		0.845		0.851		0.849		0.857		0.858		0.856		0.852		0.854		0.856
75	Grenada	Grenada																									0.702		0.711		0.713		0.727		0.729		0.735		0.739		0.738		0.743		0.747		0.749		0.754
127	Guatemala	Guatemala	0.478		0.483		0.49		0.495		0.5		0.507		0.515		0.523		0.531		0.539		0.546		0.554		0.56		0.564		0.567		0.571		0.579		0.59		0.598		0.604		0.611		0.619		0.613		0.616
175	Guinea	Guinea	0.276		0.28		0.283		0.287		0.291		0.295		0.299		0.307		0.314		0.322		0.329		0.336		0.345		0.336		0.361		0.371		0.38		0.39		0.396		0.399		0.404		0.418		0.428		0.435
177	Guinea-Bissau	Guinea-Bissau																															0.396		0.404		0.409		0.415		0.421		0.426		0.435		0.437		0.44
125	Guyana	Guyana	0.538		0.533		0.548		0.562		0.572		0.578		0.589		0.594		0.597		0.6		0.604		0.607		0.609		0.605		0.611		0.614		0.614		0.618		0.621		0.624		0.63		0.639		0.642		0.645
168	Haiti	Haiti	0.409		0.409		0.406		0.414		0.417		0.418		0.427		0.431		0.435		0.439		0.442		0.444		0.446		0.449		0.45		0.453		0.458		0.462		0.466		0.47		0.47		0.477		0.481		0.486
133	Honduras	Honduras	0.506		0.509		0.513		0.521		0.524		0.529		0.534		0.541		0.546		0.549		0.554		0.559		0.563		0.568		0.574		0.58		0.586		0.593		0.59		0.591		0.596		0.598		0.597		0.6
7	Hong Kong, China (SAR)	Hong Kong, China (SAR)	0.781		0.786		0.791		0.799		0.804		0.808		0.811		0.816		0.817		0.821		0.827		0.835		0.842		0.851		0.862		0.871		0.883		0.887		0.896		0.898		0.901		0.904		0.911		0.915
45	Hungary	Hungary	0.704		0.701				0.719		0.733		0.741		0.746		0.747		0.754		0.761		0.769		0.777		0.784		0.792		0.795		0.804		0.811		0.813		0.818		0.818		0.823		0.827		0.83		0.835
6	Iceland	Iceland	0.802		0.815		0.818		0.818		0.823		0.826		0.831		0.84		0.849		0.853		0.86		0.866		0.875		0.881		0.885		0.889		0.891		0.897		0.89		0.89		0.891		0.901		0.909		0.92
130	India	India	0.427		0.432		0.438		0.445		0.452		0.46		0.467		0.473		0.48		0.488		0.493		0.498		0.504		0.63		0.526		0.535		0.545		0.556		0.564		0.57		0.581		0.591		0.6		0.607
116	Indonesia	Indonesia	0.528		0.533		0.539		0.545		0.555		0.564		0.577		0.59		0.59		0.598		0.606		0.612		0.618		0.624		0.629		0.632		0.641		0.642		0.646		0.656		0.661		0.669		0.675		0.681
60	Iran (Islamic Republic of)	Iran (Islamic Republic of)	0.577		0.594		0.608		0.62		0.629		0.64		0.647		0.653		0.659		0.664		0.67		0.678		0.683		0.689		0.691		0.695		0.731		0.736		0.741		0.747		0.755		0.766		0.781		0.784
120	Iraq	Iraq	0.572		0.527		0.541		0.561		0.561		0.553		0.573		0.582		0.596		0.603		0.607		0.614		0.616		0.603		0.628		0.631		0.636		0.638		0.643		0.646		0.649		0.656		0.659		0.666
4	Ireland	Ireland	0.763		0.767		0.773		0.781		0.789		0.795		0.801		0.809		0.84		0.849		0.857		0.863		0.871		0.88		0.89		0.896		0.902		0.908		0.908		0.906		0.909		0.895		0.902		0.911
22	Israel	Israel	0.792		0.8		0.807		0.812		0.818		0.823		0.828		0.835		0.843		0.85		0.853		0.857		0.865		0.865		0.868		0.872		0.872		0.881		0.88		0.882		0.887		0.892		0.893		0.895
28	Italy	Italy	0.769		0.774		0.78		0.786		0.794		0.8		0.806		0.814		0.819		0.824		0.83		0.837		0.842		0.847		0.852		0.857		0.862		0.866		0.868		0.868		0.87		0.875		0.874		0.876
97	Jamaica	Jamaica	0.638		0.639		0.645		0.653		0.655		0.657		0.66		0.661		0.662		0.664		0.662		0.673		0.677		0.673		0.691		0.695		0.7		0.705		0.708		0.709		0.712		0.715		0.721		0.726
19	Japan	Japan	0.816		0.821		0.824		0.829		0.835		0.84		0.845		0.848		0.847		0.85		0.855		0.859		0.862		0.865		0.869		0.873		0.877		0.88		0.881		0.88		0.885		0.89		0.895		0.899
95	Jordan	Jordan	0.617		0.627		0.648		0.659		0.67		0.684		0.686		0.689		0.693		0.697		0.702		0.708		0.713		0.719		0.726		0.729		0.732		0.735		0.736		0.734		0.728		0.726		0.726		0.727
58	Kazakhstan	Kazakhstan	0.69		0.684				0.675		0.667		0.664		0.666		0.669		0.672		0.676		0.685		0.7		0.713		0.69		0.737		0.747		0.754		0.759		0.759		0.763		0.765		0.772		0.781		0.788
142	Kenya	Kenya	0.468		0.466		0.463		0.458		0.457		0.456		0.455		0.453		0.452		0.451		0.451		0.456		0.456		0.468		0.48		0.49		0.505		0.514		0.523		0.533		0.543		0.552		0.559		0.566
134	Kiribati	Kiribati																					0.552		0.567		0.566		0.57		0.568		0.585		0.58		0.582		0.585		0.584		0.59		0.59		0.598		0.609
22	Korea (Republic of)	Korea (Republic of)	0.728		0.739		0.746		0.756		0.767		0.778		0.789		0.8		0.797		0.808		0.817		0.824		0.832		0.839		0.847		0.855		0.862		0.869		0.874		0.869		0.884		0.888		0.89		0.893
56	Kuwait	Kuwait	0.713		0.673		0.666		0.695		0.721		0.747		0.772		0.775		0.781		0.786		0.786		0.786		0.788		0.791		0.789		0.783		0.788		0.788		0.789		0.79		0.792		0.794		0.796		0.795
122	Kyrgyzstan	Kyrgyzstan	0.618		0.611		0.601		0.588		0.569		0.563		0.568		0.576		0.58		0.587		0.594		0.602		0.604		0.611		0.615		0.616		0.621		0.628		0.631		0.636		0.636		0.639		0.649		0.658
139	Lao People's Democratic Republic	laos	0.4		0.405		0.411		0.417		0.426		0.428		0.441		0.448		0.455		0.462		0.466		0.472		0.48		0.551		0.497		0.506		0.512		0.521		0.529		0.539		0.546		0.558		0.569		0.579
41	Latvia	Latvia	0.704		0.699		0.678		0.667		0.668		0.673		0.68		0.692		0.705		0.716		0.728		0.745		0.76		0.774		0.788		0.802		0.809		0.818		0.821		0.818		0.816		0.821		0.824		0.833
80	Lebanon	Lebanon																															0.732		0.731		0.743		0.75		0.756		0.758		0.76		0.751		0.751
159	Lesotho	Lesotho	0.499		0.499		0.499		0.495		0.495		0.492		0.487		0.48		0.478		0.469		0.467		0.461		0.458		0.46		0.46		0.461		0.466		0.473		0.48		0.489		0.493		0.498		0.505		0.505
181	Liberia	Liberia																			0.35		0.387		0.377		0.374		0.335		0.373		0.378		0.383		0.394		0.399		0.404		0.407		0.417		0.42		0.429
108	Libya	Libya	0.677		0.688		0.692		0.695		0.7		0.704		0.709		0.715		0.718		0.722		0.727		0.731		0.735		0.743		0.743		0.747		0.751		0.752		0.757		0.755		0.755		0.707		0.741		0.707
17	Liechtenstein	Liechtenstein																					0.862		0.868		0.873		0.878		0.883		0.886		0.89		0.893		0.899		0.899		0.904		0.909		0.913		0.912
35	Lithuania	Lithuania	0.732		0.728		0.713		0.701		0.697		0.703		0.712		0.724		0.736		0.744		0.756		0.768		0.779		0.791		0.798		0.809		0.817		0.825		0.831		0.822		0.824		0.828		0.831		0.836
21	Luxembourg	Luxembourg	0.782		0.79		0.795		0.799		0.803		0.808		0.817		0.826		0.834		0.849		0.855		0.861		0.863		0.864		0.872		0.878		0.881		0.888		0.89		0.883		0.889		0.892		0.892		0.892
161	Madagascar	Madagascar																					0.456		0.462		0.457		0.466		0.472		0.479		0.484		0.491		0.5		0.503		0.504		0.504		0.507		0.509
171	Malawi	Malawi	0.34		0.346		0.355		0.363		0.364		0.398		0.385		0.404		0.404		0.405		0.399		0.4		0.37		0.374		0.375		0.38		0.389		0.4		0.417		0.431		0.441		0.45		0.455		0.461
57	Malaysia	Malaysia	0.643		0.652		0.66		0.668		0.675		0.683		0.695		0.706		0.71		0.716		0.725		0.723		0.725		0.68		0.734		0.731		0.737		0.75		0.761		0.765		0.772		0.778		0.781		0.785
101	Maldives	Maldives											0.539		0.553		0.568		0.58		0.595		0.606		0.61		0.615		0.63		0.635		0.631		0.643		0.651		0.66		0.66		0.671		0.682		0.688		0.696
182	Mali	Mali	0.231		0.238		0.243		0.249		0.256		0.262		0.271		0.281		0.291		0.302		0.308		0.321		0.33		0.343		0.352		0.363		0.372		0.367		0.39		0.398		0.403		0.408		0.408		0.408
29	Malta	Malta	0.74		0.745		0.749		0.753		0.756		0.759		0.763		0.768		0.776		0.78		0.783		0.788		0.792		0.8		0.809		0.824		0.822		0.827		0.829		0.83		0.843		0.843		0.849		0.856
106	Marshall Islands	Marshall Islands
159	Mauritania	Mauritania	0.374		0.379		0.387		0.399		0.411		0.418		0.428		0.427		0.435		0.441		0.442		0.442		0.449		0.451		0.461		0.466		0.475		0.476		0.476		0.484		0.487		0.49		0.499		0.508
65	Mauritius	Mauritius	0.619		0.626		0.633		0.638		0.643		0.648		0.652		0.656		0.662		0.667		0.673		0.682		0.687		0.695		0.704		0.713		0.72		0.728		0.734		0.741		0.749		0.758		0.767		0.772
74	Mexico	Mexico	0.65		0.654		0.658		0.663		0.67		0.669		0.677		0.683		0.69		0.695		0.702		0.705		0.71		0.717		0.724		0.728		0.736		0.739		0.742		0.743		0.743		0.751		0.757		0.756
131	Micronesia (Federated States of)	Micronesia (Federated States of)																					0.552		0.558		0.564		0.57		0.575		0.582		0.587		0.592		0.596		0.603		0.608		0.613		0.616		0.619
112	Moldova (Republic of)	Moldova (Republic of)	0.651		0.64		0.62		0.618		0.595		0.594		0.591		0.593		0.593		0.595		0.597		0.607		0.617		0.63		0.64		0.648		0.656		0.661		0.666		0.662		0.67		0.677		0.684		0.693
92	Mongolia	Mongolia	0.579		0.574		0.561		0.547		0.55		0.555		0.561		0.568		0.576		0.582		0.589		0.6		0.609		0.622		0.637		0.65		0.66		0.672		0.683		0.689		0.697		0.711		0.72		0.729
50	Montenegro	Montenegro																											0.741		0.748		0.753		0.764		0.775		0.786		0.788		0.793		0.798		0.8		0.803
123	Morocco	Morocco	0.458		0.464		0.468		0.474		0.485		0.489		0.499		0.503		0.51		0.52		0.53		0.541		0.552		0.563		0.572		0.58		0.586		0.594		0.602		0.608		0.616		0.626		0.635		0.645
180	Mozambique	Mozambique	0.209		0.212		0.208		0.214		0.221		0.229		0.253		0.266		0.279		0.291		0.298		0.311		0.318		0.333		0.343		0.357		0.365		0.378		0.388		0.397		0.403		0.407		0.412		0.423
148	Myanmar	Myanmar	0.359		0.366		0.38		0.387		0.393		0.398		0.404		0.41		0.413		0.421		0.431		0.44		0.449		0.459		0.468		0.477		0.487		0.498		0.509		0.519		0.53		0.54		0.549		0.558
129	Namibia	Namibia	0.579		0.582		0.587		0.589		0.591		0.588		0.581		0.575		0.569		0.56		0.558		0.557		0.554		0.556		0.557		0.556		0.56		0.568		0.575		0.583		0.594		0.607		0.617		0.628
149	Nepal	Nepal	0.378		0.386		0.394		0.398		0.405		0.41		0.42		0.426		0.432		0.439		0.446		0.447		0.457		0.462		0.469		0.475		0.486		0.491		0.502		0.514		0.529		0.535		0.548		0.554
10	Netherlands	Netherlands	0.829		0.834		0.835		0.839		0.864		0.861		0.866		0.865		0.867		0.87		0.876		0.879		0.878		0.883		0.886		0.891		0.897		0.904		0.906		0.906		0.91		0.921		0.921		0.923
16	New Zealand	New Zealand	0.818		0.82		0.825		0.836		0.845		0.851		0.854		0.86		0.863		0.865		0.869		0.873		0.881		0.884		0.886		0.888		0.891		0.894		0.894		0.898		0.899		0.902		0.905		0.907
124	Nicaragua	Nicaragua	0.489		0.498		0.505		0.509		0.514		0.524		0.534		0.543		0.552		0.562		0.57		0.577		0.583		0.587		0.592		0.596		0.6		0.607		0.614		0.615		0.621		0.627		0.633		0.639
189	Niger	Niger	0.21		0.214		0.216		0.22		0.224		0.229		0.235		0.238		0.246		0.25		0.252		0.258		0.263		0.266		0.274		0.283		0.289		0.294		0.303		0.308		0.318		0.325		0.336		0.34
157	Nigeria	Nigeria																											0.443		0.462		0.465		0.475		0.479		0.485		0.49		0.484		0.494		0.512		0.519
1	Norway	Norway	0.85		0.856		0.862		0.87		0.885		0.883		0.888		0.894		0.906		0.911		0.917		0.916		0.918		0.924		0.934		0.932		0.936		0.938		0.938		0.938		0.942		0.943		0.942		0.946
48	Oman	Oman																					0.704		0.716		0.725		0.736		0.742		0.748		0.752		0.764		0.782		0.789		0.793		0.795		0.804		0.812
150	Pakistan	Pakistan	0.404		0.409		0.414		0.418		0.423		0.428		0.433		0.437		0.441		0.445		0.45		0.457		0.465		0.473		0.487		0.5		0.505		0.513		0.515		0.522		0.526		0.53		0.535		0.538
60	Palau	Palau																					0.743		0.747		0.751		0.754		0.758		0.76		0.762		0.765		0.764		0.767		0.769		0.775		0.778		0.78
119	Palestine, State of	Palestine, State of																													0.65		0.657		0.658		0.663		0.66		0.67		0.672		0.677		0.687		0.679
66	Panama	Panama	0.66		0.665		0.673		0.68		0.684		0.688		0.694		0.7		0.708		0.713		0.719		0.722		0.728		0.73		0.735		0.739		0.744		0.751		0.755		0.756		0.758		0.764		0.771		0.776
153	Papua New Guinea	Papua New Guinea	0.38		0.388		0.398		0.41		0.417		0.425		0.432		0.435		0.441		0.445		0.449		0.456		0.462		0.469		0.472		0.479		0.484		0.499		0.503		0.51		0.52		0.529		0.53		0.534
110	Paraguay	Paraguay	0.58		0.585		0.589		0.596		0.6		0.606		0.613		0.618		0.622		0.625		0.624		0.632		0.642		0.64		0.646		0.649		0.649		0.655		0.664		0.659		0.675		0.68		0.68		0.695
89	Peru	Peru	0.611		0.617		0.617		0.622		0.633		0.643		0.648		0.654		0.665		0.675		0.678		0.686		0.687		0.686		0.693		0.698		0.695		0.703		0.712		0.715		0.717		0.729		0.729		0.736
113	Philippines	Philippines	0.586		0.587		0.589		0.591		0.595		0.598		0.606		0.611		0.615		0.62		0.624		0.628		0.633		0.637		0.647		0.65		0.651		0.657		0.661		0.659		0.665		0.67		0.677		0.685
33	Poland	Poland	0.712		0.711		0.714		0.725		0.734		0.74		0.748		0.759		0.769		0.778		0.785		0.791		0.799		0.804		0.802		0.808		0.814		0.819		0.824		0.828		0.835		0.839		0.836		0.85
41	Portugal	Portugal	0.711		0.72		0.732		0.745		0.753		0.76		0.767		0.773		0.78		0.779		0.785		0.79		0.792		0.796		0.797		0.8		0.803		0.81		0.814		0.817		0.822		0.826		0.829		0.837
37	Qatar	Qatar	0.754		0.751		0.753		0.764		0.775		0.784		0.796		0.8		0.804		0.808		0.81		0.811		0.816		0.823		0.826		0.831		0.827		0.83		0.835		0.833		0.825		0.836		0.844		0.854
52	Romania	Romania	0.701		0.686		0.678		0.678		0.681		0.687		0.695		0.696		0.698		0.704		0.709		0.715		0.724		0.734		0.746		0.755		0.767		0.781		0.795		0.798		0.797		0.798		0.795		0.8
49	Russian Federation	Russia	0.734		0.729		0.718		0.71		0.702		0.7		0.701		0.704		0.703		0.709		0.72		0.727		0.732		0.69		0.746		0.752		0.759		0.767		0.774		0.771		0.78		0.789		0.798		0.804
158	Rwanda	Rwanda	0.25		0.227		0.213		0.209		0.199		0.234		0.262		0.288		0.302		0.32		0.335		0.345		0.361		0.374		0.391		0.408		0.429		0.445		0.455		0.47		0.485		0.493		0.5		0.503
72	Saint Kitts and Nevis	Saint Kitts and Nevis																															0.727		0.73		0.733		0.738		0.74		0.745		0.751		0.756		0.763
90	Saint Lucia	Saint Lucia																					0.69		0.687		0.689		0.692		0.695		0.7		0.711		0.713		0.719		0.724		0.731		0.734		0.73		0.733
99	Saint Vincent and the Grenadines	Saint Vincent and the Grenadines																					0.673		0.677		0.682		0.689		0.692		0.697		0.704		0.709		0.71		0.713		0.715		0.717		0.718		0.721
104	Samoa	Samoa	0.62		0.622		0.624		0.63		0.611		0.618		0.628		0.63		0.636		0.642		0.647		0.654		0.659		0.663		0.669		0.673		0.675		0.681		0.685		0.687		0.693		0.697		0.697		0.7
143	Sao Tome and Principe	Sao Tome and Principe	0.453		0.455		0.458		0.462		0.466		0.469		0.474		0.477		0.481		0.486		0.49		0.496		0.499		0.505		0.51		0.517		0.526		0.53		0.53		0.538		0.542		0.548		0.551		0.56
39	Saudi Arabia	Saudi Arabia	0.697		0.706		0.711		0.714		0.718		0.722		0.727		0.731		0.736		0.738		0.743		0.746		0.748		0.756		0.765		0.77		0.777		0.783		0.791		0.796		0.808		0.823		0.835		0.844
164	Senegal	Senegal	0.367		0.367		0.368		0.367		0.366		0.368		0.369		0.37		0.373		0.375		0.38		0.395		0.4		0.407		0.415		0.422		0.427		0.436		0.445		0.449		0.456		0.467		0.476		0.481
67	Serbia	Serbia	0.718		0.715		0.702		0.685		0.689		0.695		0.699		0.705		0.708		0.704		0.711		0.716		0.72		0.726		0.734		0.742		0.747		0.751		0.757		0.759		0.759		0.769		0.768		0.771
62	Seychelles	Seychelles																					0.718		0.714		0.716		0.717		0.715		0.73		0.72		0.741		0.741		0.741		0.747		0.741		0.77		0.779
184	Sierra Leone	Sierra Leone	0.275		0.267		0.264		0.269		0.271		0.274		0.269		0.268		0.272		0.276		0.284		0.299		0.315		0.325		0.334		0.342		0.35		0.363		0.373		0.381		0.385		0.392		0.407		0.419
9	Singapore	Singapore	0.718		0.729		0.74		0.751		0.763		0.773		0.782		0.793		0.798		0.809		0.819		0.822		0.83		0.838		0.845		0.868		0.871		0.878		0.883		0.884		0.909		0.914		0.92		0.923
38	Slovakia	Slovak	0.739		0.734		0.733		0.737		0.743		0.751		0.754		0.757		0.763		0.762		0.764		0.764		0.771		0.777		0.785		0.794		0.803		0.814		0.822		0.824		0.829		0.837		0.842		0.844
25	Slovenia	Slovenia	0.767		0.765		0.766		0.769		0.775		0.782		0.788		0.796		0.805		0.819		0.825		0.835		0.843		0.85		0.857		0.861		0.869		0.873		0.878		0.878		0.882		0.884		0.877		0.885
152	Solomon Islands	Solomon Islands																			0.463		0.45		0.455		0.462		0.469		0.477		0.487		0.497		0.505		0.504		0.497		0.507		0.514		0.529		0.539
113	South Africa	South Africa	0.618		0.626		0.635		0.641		0.645		0.649		0.647		0.644		0.639		0.634		0.63		0.61		0.617		0.615		0.613		0.614		0.616		0.621		0.633		0.642		0.649		0.657		0.664		0.675
187	South Sudan	South Sudan																																									0.413		0.416		0.388		0.392
26	Spain	Spain	0.754		0.764		0.772		0.782		0.791		0.8		0.806		0.81		0.814		0.819		0.825		0.828		0.83		0.833		0.837		0.844		0.848		0.853		0.856		0.858		0.865		0.87		0.873		0.875
76	Sri Lanka	Sri Lanka	0.625		0.63		0.635		0.637		0.646		0.65		0.655		0.662		0.668		0.676		0.685		0.691		0.697		0.67		0.711		0.718		0.724		0.73		0.738		0.74		0.745		0.751		0.757		0.759
167	Sudan	Sudan	0.331		0.336		0.345		0.352		0.359		0.366		0.375		0.384		0.39		0.396		0.402		0.408		0.414		0.42		0.429		0.436		0.446		0.451		0.463		0.468		0.47		0.474		0.485		0.475
100	Suriname	Suriname																													0.671		0.676		0.681		0.687		0.691		0.677		0.703		0.706		0.711		0.715
7	Sweden	Sweden	0.816		0.818		0.821		0.84		0.849		0.856		0.863		0.874		0.888		0.893		0.897		0.9		0.902		0.908		0.896		0.899		0.902		0.905		0.901		0.899		0.905		0.906		0.908		0.912
2	Switzerland	Switzerland	0.832		0.834		0.836		0.841		0.844		0.848		0.854		0.864		0.873		0.881		0.889		0.891		0.891		0.896		0.901		0.905		0.912		0.915		0.917		0.927		0.932		0.932		0.935		0.938
155	Syrian Arab Republic	Syrian Arab Republic			0.562		0.568		0.571		0.576		0.579		0.583		0.587		0.59		0.589		0.59		0.597		0.6		0.61		0.623		0.635		0.643		0.649		0.646		0.648		0.644		0.642		0.631		0.572
127	Tajikistan	Tajikistan	0.623		0.618		0.597		0.579		0.558		0.55		0.534		0.538		0.541		0.544		0.55		0.558		0.568		0.578		0.587		0.593		0.599		0.604		0.618		0.62		0.634		0.637		0.642		0.646
154	Tanzania (United Republic of)	Tanzania (United Republic of)	0.37		0.371		0.37		0.37		0.369		0.371		0.372		0.375		0.381		0.388		0.395		0.403		0.413		0.423		0.434		0.448		0.458		0.468		0.477		0.486		0.493		0.499		0.506		0.507
83	Thailand	Thailand	0.574		0.583		0.589		0.597		0.604		0.611		0.619		0.625		0.63		0.64		0.649		0.657		0.666		0.674		0.683		0.693		0.699		0.71		0.714		0.718		0.724		0.727		0.731		0.728
80	The former Yugoslav Republic of Macedonia	The former Yugoslav Republic of Macedonia																					0.669		0.673		0.679		0.686		0.693		0.702		0.708		0.712		0.728		0.731		0.735		0.738		0.74		0.743
132	Timor-Leste	Timor-Leste																					0.507		0.513		0.523		0.525		0.519		0.496		0.536		0.581		0.599		0.61		0.619		0.624		0.599		0.614
165	Togo	Togo	0.405		0.408		0.399		0.39		0.396		0.409		0.417		0.424		0.423		0.424		0.425		0.426		0.427		0.431		0.434		0.436		0.443		0.441		0.44		0.449		0.456		0.463		0.466		0.472
98	Tonga	Tonga	0.648		0.654		0.656		0.66		0.668		0.671		0.671		0.671		0.674		0.676		0.673		0.677		0.683		0.692		0.693		0.693		0.695		0.698		0.702		0.706		0.712		0.716		0.717		0.716
69	Trinidad and Tobago	Trinidad and Tobago	0.672		0.673		0.673		0.675		0.679		0.683		0.69		0.697		0.704		0.711		0.716		0.721		0.728		0.737		0.746		0.752		0.757		0.768		0.773		0.772		0.775		0.773		0.774		0.779
95	Tunisia	Tunisia	0.569		0.575		0.583		0.589		0.6		0.607		0.616		0.623		0.634		0.645		0.653		0.661		0.666		0.673		0.682		0.689		0.695		0.701		0.707		0.71		0.716		0.718		0.719		0.723
64	Turkey	Turkey	0.579		0.583		0.589		0.597		0.599		0.607		0.615		0.624		0.635		0.643		0.655		0.662		0.672		0.679		0.685		0.69		0.701		0.708		0.71		0.718		0.734		0.753		0.76		0.771
108	Turkmenistan	Turkmenistan																																									0.673		0.68		0.686		0.692
162	Uganda	Uganda	0.311		0.311		0.305		0.312		0.315		0.321		0.338		0.353		0.368		0.384		0.398		0.406		0.421		0.43		0.43		0.437		0.449		0.459		0.47		0.477		0.486		0.49		0.492		0.496
88	Ukraine	Ukraine	0.705		0.701		0.692		0.681		0.668		0.664		0.661		0.663		0.665		0.667		0.671		0.681		0.689		0.699		0.706		0.715		0.721		0.729		0.733		0.727		0.733		0.738		0.743		0.745
34	United Arab Emirates	United Arab Emirates	0.727		0.738		0.742		0.748		0.756		0.764		0.771		0.778		0.785		0.791		0.798		0.803		0.808		0.813		0.818		0.825		0.83		0.835		0.838		0.835		0.836		0.841		0.846		0.851
14	United Kingdom	uk	0.775		0.788		0.801		0.814		0.827		0.839		0.844		0.849		0.855		0.861		0.867		0.871		0.874		0.878		0.886		0.891		0.889		0.892		0.896		0.899		0.905		0.899		0.898		0.915
13	United States	United States	0.86		0.861		0.867		0.871		0.875		0.877		0.879		0.881		0.884		0.885		0.885		0.887		0.889		0.893		0.895		0.898		0.901		0.905		0.91		0.91		0.914		0.917		0.918		0.916
55	Uruguay	Uruguay	0.692		0.697		0.7		0.703		0.709		0.711		0.717		0.727		0.735		0.737		0.742		0.746		0.747		0.75		0.754		0.756		0.761		0.762		0.766		0.778		0.773		0.782		0.79		0.797
105	Uzbekistan	Uzbekistan																					0.595		0.602		0.609		0.614		0.621		0.628		0.634		0.646		0.653		0.659		0.666		0.674		0.683		0.69
138	Vanuatu	Vanuatu																															0.572		0.579		0.582		0.589		0.59		0.591		0.592		0.592		0.597
78	Venezuela (Bolivarian Republic of)	Venezuela (Bolivarian Republic of)	0.634		0.644		0.651		0.653		0.654		0.658		0.66		0.664		0.667		0.67		0.672		0.68		0.688		0.687		0.7		0.714		0.727		0.744		0.753		0.753		0.759		0.771		0.774		0.776
116	Viet Nam	VietNam	0.475		0.484		0.496		0.506		0.517		0.529		0.54		0.539		0.559		0.567		0.579		0.587		0.595		0.603		0.612		0.616		0.624		0.632		0.64		0.656		0.654		0.664		0.67		0.675
178	Yemen	Yemen	0.399		0.403		0.405		0.408		0.409		0.415		0.422		0.427		0.431		0.434		0.443		0.45		0.456		0.463		0.469		0.474		0.479		0.482		0.485		0.491		0.498		0.499		0.505		0.507
144	Zambia	Zambia	0.401		0.402		0.403		0.409		0.408		0.412		0.416		0.419		0.42		0.426		0.432		0.44		0.449		0.46		0.469		0.48		0.492		0.503		0.517		0.533		0.544		0.556		0.569		0.574
156	Zimbabwe	Zimbabwe	0.491		0.494		0.481		0.476		0.473		0.467		0.466		0.459		0.453		0.448		0.44		0.442		0.435		0.428		0.428		0.43		0.435		0.442		0.439		0.45		0.467		0.478		0.505		0.516
[truncated: 8 more columns]
